# Supplementary material
Source: HighWire-hosted journal article supplement (https://www.cmajopen.ca/highwire/filestream/89278/field_highwire_adjunct_files/0/open-2021-0207-1-at.pdf)

## Supplemental Material

### **Comparative Effectiveness of Metformin versus Sulfonylurea on Kidney Function Decline or Death Among Patients with Reduced Kidney Function**

Adriana M. Hung, MD MPH; Amber J. Hackstadt, PhD; Marie R. Griffin, MD MPH; Carlos G. Grijalva, MD MPH; Robert Greevy, PhD; Christianne L. Roumie MD MPH

1. Supplemental Methods
2. Supplemental Table 1: Definitions of Kidney Outcomes
3. Supplemental Table 2: Definitions of Comorbid Conditions and Medications used as covariates
4. Supplemental Table 3. Characteristics of full unmatched cohort on index date and 361 days after reaching kidney function threshold
5. Supplemental Table 4: Events and N at risk in each Subgroup- \*Hazard Ratio reported are from weighted and unadjusted analyses
6. Supplemental Figure 1: Study Schema
7. Strobe Checklist

## Supplemental Methods

**Study Population:** New users were patients who filled a first hypoglycemic prescription without any diabetic drug fill in the 180 days prior. Patients were required to persist on this hypoglycemic medication with medication gaps no larger than 180 days until they reached the index date. The index date was defined as reaching an eGFR of  $<60$  ml/min/1.73m<sup>2</sup> (Supplemental Figure 1). The index date was restricted to dates between January 1, 2002 and December 30, 2016 to allow sufficient collection of baseline data and follow-up.

**Covariates:** Study covariates were measured up to 720 days prior to the index date (or index date + 360 days for the 361 days and beyond analysis) and included: age, sex, race, year, number of months from initial antidiabetic medication start to reaching the reduced kidney function threshold, and Veterans Integrated Service Networks (VISN) of care. Physiologic variables were evaluated as the measure closest to the index date and included: body mass index [BMI], blood pressure, HbA1c, low density lipoprotein levels, hemoglobin, presence of proteinuria, and creatinine (both the historical measure prior to index date and the creatinine on the index date). Healthcare utilization (hospitalization, nursing home and additional insurance use including Medicare or Medicaid) was measured in the year prior to the reduced kidney function threshold (or reduced kidney function threshold + 360 days for the 361 days and beyond analysis). We collected data on smoking, and co-morbidities defined in Supplemental Table 2. Selected medications' fills ascertained through pharmacy claims within 180-days were covariates.

**eGFR Decline:** Identifying the timing of a *sustained* decline in eGFR is challenging in studies using EHR data. This study opted to use the first confirmed eGFR showing a decline because the decline had to have begun by that time or earlier. However, the necessity of observing a confirmatory eGFR 3-12 months later raises the question of whether the second measurement should be the event date. We note that the use of the second "confirmatory" eGFR may exacerbate the uncertainty in event timing, pushing the time back 3-12 months, and if ascertainment bias driven by more aggressive testing in one arm is a concern, this too would be exaggerated by using the confirmatory measurement. In most cases, using rules that require "looking into the future" are discouraged in pharmacoepidemiology because of the potential for immortal time bias. In this, a death that occurred after the first measurement showing an eGFR decline but before a confirmatory measurement would be observed and treated as a death event. Thus, a minimum of 3 months of survival after the eGFR measurement is required to have a sustained eGFR decline event, but no survival time is required to have the primary composite outcome event.

**Cohorts:** While the effect on mortality was similar between the first and later years, the effect on eGFR decline was notably different. Reaching a sustained 40% eGFR decline or death within the first year of eGFR  $<60$  ml/min is suggestive of serious renal dysfunction. Thus, the events that occurred within that first year may have been indicative of a unique population with significant multimorbidity. This population, which can ultimately only be identified retrospectively by their outcomes, is important and worth understanding, but it is also distinct from the remainder of the cohort. Thus, we separated the first year from the others to better distinguish this population from the remainder which continues in a more typical renal trajectory. This is akin to analyses of cancer outcomes that will begin one-year after medication initiation in order to account for lag-time bias. We noted that after the first year, the proportional hazards assumption was well met for the remaining timeframe.

**Propensity Score Weighting:** The propensity score modeled the probability of metformin or sulfonylurea continuation at index date given the observed covariates, VISN, and an indicator for imputed covariates. Missing covariates were handled with multiple imputations (see section on multiple imputation). We used matching weights derived from the propensity score to balance both exposure groups on observed covariates. Matching weights were derived beginning at 361 days for the cohort who remained at risk. Standardized mean differences (SMD) were calculated as the difference between groups in number of standard deviations. Smaller SMD values indicate less difference between groups with 0 indicating perfect balance in mean or proportion.

**Multiple Imputation:** Multiple imputation is used to address missingness in the baseline covariates in the propensity score model and the covariate adjusted cox proportional hazard models. Data values are imputed using Predictive Mean Matching (PMM) which is a semi-parametric imputation approach that fits a regression model to impute the missing values

but randomly selects a value to impute among observed values closest to the regression-predicted value. Selecting a value from the observed values ensures that imputed values are plausible. PMM is used to create 20 multiply imputed data sets. A regression model is fit for each of the imputed data sets. Predicted values are obtained from a regression model with parameters found using Rubin's rules to combine the parameter estimates from the regression models on the 20 imputed data sets. The modes (discrete variables) and the medians (continuous variables) of the imputed data sets are used for the missing covariate values when calculating the predicted values.

Though multiple imputation was used in estimating the propensity scores, a single set of predicted propensity scores is used to create the propensity score weights. The objective is to create a single set of weights that balance the observed covariate distributions and the observed missingness patterns. The effectiveness of these weights is judged by the weighted table of patient characteristics. The multiple imputation process was leveraged for the propensity score estimation, but it was not essential for attaining proper variance estimates in the weighted analysis. The correct variance estimates are found by treating the propensity score weights as sampling weights, which are akin to survey weights. In contrast, when the covariates are used in direct covariate adjustment, the multiple imputation is needed to attain proper estimates of uncertainty. For ease of computation, the same 20 imputed data sets are used for each regression model.

**Competing Risk Analysis** It is important to specify the different objectives of the proportional hazards model used in the primary analysis and the competing risks method used to estimate the cumulative incidence function. The primary analysis estimates a cause-specific hazard ratio using a cox proportional hazard regression model treating competing events as censoring events. This estimator is most useful for understanding the association between the medications and outcomes, sometimes referred to as the etiological effect. However, in the presence of competing risks, this hazard ratio cannot be used to estimate the absolute or realized effect size. There is no longer a straightforward relationship between the hazard rate and risk in this model. In particular, the survival curve created by censoring for competing events is biased and its inverse will likely overestimate risk (Anderson 2012)<sup>1</sup>. Risk is estimated using a multistate model (Putter 2007)<sup>2</sup> where the initial state is reduced kidney function. A patient could transition to the outcome of interest or a competing event and these events are treated as terminal states to allow the estimation of the cumulative incidence rate. Cumulative incidence curves are generated using the Aalen–Johansen estimator (Aalen 1978)<sup>3</sup>. The non-parametric Aalen-Johansen estimator is preferred over the semi-parametric Fine and Gray model (Fine 1999) because it allows more flexibility when modeling the cumulative incidence function<sup>4</sup>. The Fine and Gray model assumes proportional sub-distributional hazards and that those censored for competing risks are still in the risk set, both of which are not appropriate for this study. Presenting both cause-specific hazard and estimates of risk is essential to understanding the etiological and the realized effects, which may differ in magnitude due to the competing risks. Thus, both the cause-specific hazard and the cumulative incidence function was estimated for the weighted cohorts.

- 1) Per Kragh Andersen, Ronald B Geskus, Theo de Witte and Hein Putter (2012) Competing risks in epidemiology: possibilities and pitfalls. *International Journal of Epidemiology* 41:861–870.
- 2) H. Putter, M. Fiocco and R. B. Geskus (2007) Tutorial in biostatistics: Competing risks and multi-state models. *Statistics in Medicine* 26:2389–2430.
- 3) Odd O. Aalen and Soren Johansen (1978) An Empirical Transition Matrix for Non-Homogeneous Markov Chains Based on Censored Observations. *Scandinavian Journal of Statistics*, 5 (3): 141-150.
- 4) Jason P. Fine and Robert J. Gray (1999) "A Proportional Hazards Model for the Subdistribution of a Competing Risk." *Journal of the American Statistical Association* 94 (446) : 496-509.

**Supplemental table 1: The definition of the composite outcome (reaching the first of GFR event or ESRD).**

| <b>Outcome</b>                        | <b>Definition</b>                                                                                                                                                                                                                                                                                                                                                                                                                                                                                                                                                                          |
|---------------------------------------|--------------------------------------------------------------------------------------------------------------------------------------------------------------------------------------------------------------------------------------------------------------------------------------------------------------------------------------------------------------------------------------------------------------------------------------------------------------------------------------------------------------------------------------------------------------------------------------------|
| 1. GFR event                          | <b>40%</b> decrease in eGFR noted on the first of 2 outpatient laboratory values. Requires change to be present on 2 outpatient GFR calculations between 3 and 12 months apart                                                                                                                                                                                                                                                                                                                                                                                                             |
| 2. ESRD                               |                                                                                                                                                                                                                                                                                                                                                                                                                                                                                                                                                                                            |
| a. eGFR <15 ml/min/1.73m <sup>2</sup> | An outpatient laboratory measurement of eGFR <15 ml/min/1.73 m <sup>2</sup> with confirmatory eGFR <15 or dialysis code at least 3 months and less than 12 months apart                                                                                                                                                                                                                                                                                                                                                                                                                    |
| b. dialysis                           | Either an inpatient and outpatient code or 2 outpatient codes for dialysis as the primary diagnosis (at least 3 months and less than 12 months apart)<br>Codes include <ul style="list-style-type: none"> <li>1. ICD-9: 585.6 for ESRD on dialysis</li> <li>2. Procedure codes 3993 or 5498 indicating dialysis treatment</li> <li>3. CPT4 codes 90935, 90937, 90945, 90947, 90989, 90993, 90921, 90925, indicating dialysis or dialysis training</li> <li>4. ICD-9: V56 encounter for dialysis catheter; V56.2 PD adjustment; V56.8 Peritoneal dialysis; V45.1 dialysis status</li> </ul> |
| c. transplant                         | Either an inpatient and outpatient code for renal transplant as the primary diagnosis<br>Codes include <ul style="list-style-type: none"> <li>1. ICD 9 codes: 996.81 Complications of Transplanted kidney; V42.0 Kidney replaced by transplant or 55.6, 55.61, 55.69 transplant of Kidney</li> <li>2. CPT codes: 50360, 50365, 50380 Renal Auto or Allotransplantation</li> </ul>                                                                                                                                                                                                          |

**Supplemental table 2: Definitions of comorbid conditions based on codes in 720 days before reaching Kidney threshold**

| <b>Covariate Condition</b>      | <b>Inclusive conditions</b>                                 | <b>Definition*</b>                                                                                                                                                                                                                                                                                                                                                                                                                                                                                                                                                                                                                                                                                                                                                                                                                                                                                                               |
|---------------------------------|-------------------------------------------------------------|----------------------------------------------------------------------------------------------------------------------------------------------------------------------------------------------------------------------------------------------------------------------------------------------------------------------------------------------------------------------------------------------------------------------------------------------------------------------------------------------------------------------------------------------------------------------------------------------------------------------------------------------------------------------------------------------------------------------------------------------------------------------------------------------------------------------------------------------------------------------------------------------------------------------------------|
| <b>Malignancy</b>               | Cancer excluding non melanoma skin cancer                   | ICD 9- CM diagnosis codes:140.X-208.X (exclude 173)<br>ICD10 diagnosis codes: C00* - C96*; D37* -D48*                                                                                                                                                                                                                                                                                                                                                                                                                                                                                                                                                                                                                                                                                                                                                                                                                            |
| <b>Liver failure</b>            | End stage liver disease                                     | ICD 9- CM diagnosis codes: 570.X- 573.X<br>ICD10 diagnosis codes: K72*; K70.*; K73.*; K74.*; K76.*                                                                                                                                                                                                                                                                                                                                                                                                                                                                                                                                                                                                                                                                                                                                                                                                                               |
| <b>Respiratory Failure</b>      | Respiratory failure/<br>Pulmonary                           | ICD 9- CM diagnosis codes: 518.81, 518.83, 518.84, 799.1, 415.X, 416.X<br>ICD10 diagnosis codes: J96.*; R092; I26.9*; I27. *                                                                                                                                                                                                                                                                                                                                                                                                                                                                                                                                                                                                                                                                                                                                                                                                     |
| <b>Congestive Heart Failure</b> | Embolism/Hypertension<br>CHF (excluding post procedure-CHF) | ICD 9- CM diagnosis codes: 428.X, 402.01, 402.11, 402.91, 404.01, 404.03, 404.11, 404.13, 404.91, 404.93<br>ICD10 diagnosis codes: I11.0, I13.0, I13.2, I50.9, I50.1,I50.20, I50.21, I50.22, I50.23, I50.30, I50.31, I50.32, I50.33, I50.40, I50.41, I50.42, I50.43                                                                                                                                                                                                                                                                                                                                                                                                                                                                                                                                                                                                                                                              |
| <b>Cardiovascular disease</b>   | 1. MI                                                       | ICD 9- CM diagnosis codes: 410.X, 412.X, 429.7X<br>ICD10 diagnosis codes: I21*                                                                                                                                                                                                                                                                                                                                                                                                                                                                                                                                                                                                                                                                                                                                                                                                                                                   |
|                                 | 2. Obstructive coronary disease                             | ICD 9- CM diagnosis codes: 411.X, 413.X, 414.X<br>ICD10 diagnosis codes: I24.*; I25.*; I20.*<br>ICD 9- CM procedure codes: 36.01, 36.02, 36.03, 36.05, 36.09, 36.10-36.19<br>CPT procedure codes: 33533-36, 33510-23, 33530, 92980-82,92984, 92995-6, 92974                                                                                                                                                                                                                                                                                                                                                                                                                                                                                                                                                                                                                                                                      |
|                                 | 3. Peripheral artery disease or revascularization           | ICD 9- CM diagnosis codes: 440.2X, 442.2, 443.1, 443.9, 445.0X<br>ICD10 diagnosis codes: I70.2*; I72.*; I77.*; I73.9; I75.*<br>ICD9-CM procedure codes:38.08-09, 38.18, 38.38,38.39, 38.48, 38.49, 38.88, 38.89, 39.25, 39.29, 39.5, 84.1X<br>CPT procedure codes: 35226,35256, 35286, 35351, 35355, 35371, 35372, 35381, 35454, 35456, 35459, 35473, 35474, 35482, 35483, 35485, 35492, 35493, 35495, 35546, 35548, 35549, 35551, 35556, 35558, 35563, 35565, 35566, 35571, 35583, 35585, 35587, 35646, 35651, 35654, 35656, 35661, 35663, 35665, 35666, 35671, 34800, 34802-5                                                                                                                                                                                                                                                                                                                                                  |
|                                 | 4. Carotid revascularization                                | ICD9-CM procedure codes: 38.12, 38.11, 00.61, 00.63, 39.28<br>CPT procedure codes: 35301, 0005T, 0006T, 0007T, 0075T, 0076T, 37215, 37216<br>ICD10 procedure code: 031H0AG, 031H0JG, 031H0KG, 031H0ZG, 031J09G, 031J0AG, 031J0JG,031J0KG,031H09G, 031J0ZG, 037H34Z, 037H3DZ, 037H3ZZ, 037H44Z, 037H4DZ, 037H4ZZ, 037J3DZ, 037J3ZZ, 037J44Z, 037J4DZ, 037J4ZZ, 037K34Z, 037K3DZ, 037K3ZZ, 037K4DZ,037K4ZZ, 037L34Z, 037L3DZ, 037L3ZZ, 037L44Z, 037L4DZ, 037L4ZZ, 037M34Z, 037M3DZ, 037M3ZZ, 037M44Z, 037M4DZ, 037M4ZZ, 037N34Z, 037N3DZ, 037N3ZZ, 037N44Z, 037N4DZ, 037N4ZZ, 037P34Z, 037P3DZ, 037P3ZZ, 037P44Z, 037P4DZ, 037P4ZZ, 037Q34Z, 037Q3DZ, 037Q3ZZ, 037Q44Z, 037Q4DZ, 037Q4ZZ, 03CH0ZZ, 03CH3ZZ, 03CH4ZZ, 03CJ0ZZ, 03CJ3ZZ, 03CJ4ZZ, 03CK0ZZ, 03CK3ZZ, 03CK4ZZ, 03CL0ZZ, 03CL3ZZ, 03CL4ZZ, 03CM0ZZ, 03CM3ZZ, 03CM4ZZ, 037J34Z, 03CN0ZZ, 03CN3ZZ, 03CN4ZZ, 03CP0ZZ, 03CP3ZZ, 037K44Z, 03CP4ZZ, 03CQ0ZZ, 03CQ3ZZ, 03CQ4ZZ |

Appendix 1, as supplied by the authors. Appendix to: Hung AM, Hackstadt AJ, Griffin MR, et al. Comparative effectiveness of metformin versus sulfonylureas on kidney function decline or death among patients with reduced kidney function: a retrospective cohort study. *CMAJ Open* 2023. DOI:10.9778/cmajo.20210207. Copyright © 2023 The Author(s) or their employer(s). To receive this resource in an accessible format, please contact us at [cmajgroup@cmaj.ca](mailto:cmajgroup@cmaj.ca).

|                                         |                                   |                                                                                                                                                                                                                                                                                                                                                                                                |
|-----------------------------------------|-----------------------------------|------------------------------------------------------------------------------------------------------------------------------------------------------------------------------------------------------------------------------------------------------------------------------------------------------------------------------------------------------------------------------------------------|
| <b>TIA</b>                              |                                   | HCPCS procedure code: S2211<br>ICD 9- CM diagnosis codes: 435.X<br>ICD10 diagnosis codes: G45.0; G45.1; G45.8; G45.9; I67.848                                                                                                                                                                                                                                                                  |
| <b>Stroke</b>                           |                                   | ICD 9- CM diagnosis codes: 430.X, 431.X, 434.X, 436.X<br>ICD10 diagnosis codes: I67.89, I60.9, I61.9, I63.30, I63.40, I63.50, I66.09, I66.19, I66.29, I66.9, I67.89                                                                                                                                                                                                                            |
| <b>Serious Mental illness</b>           | 1. Dementia                       | ICD 9- CM diagnosis codes: 290.X, 291.2, 292.82, 294.1X, 331.0-331.1X, 331.82<br>ICD 10 diagnosis codes: F03.9; F01.5*; F10.27; F19.97; F02.80; F02.81; G30.9; G31.*<br>Medications: Donepezil, Rivastigmine, Galantamine, Tacrine, Memantine, Bethanechol, Ambenonium, Atomoxetine, Ergoloid Mesylates, Dihydrogenated Ergot, Neostigmine, Physostigmine, Pyridostigmine, Riluzole, Hydergine |
|                                         | 2. Depression                     | ICD 9- CM diagnosis codes: 311, 300.4, 296.2, 296.3, V79.0<br>ICD 10 diagnosis codes: F33.9, F34.1, F32.*                                                                                                                                                                                                                                                                                      |
|                                         | 3. Schizophrenia                  | ICD 9- CM diagnosis codes: 295.X<br>ICD 10 diagnosis codes: F20.*                                                                                                                                                                                                                                                                                                                              |
|                                         | 4. Bipolar disorder               | ICD 9- CM diagnosis codes: 296.0, 296.4X, 296.5X, 296.6X, 296.7, 296.80, 296.89<br>ICD 10 diagnosis codes: F30.* F31.*                                                                                                                                                                                                                                                                         |
|                                         | 5. Post traumatic stress disorder | ICD 9- CM diagnosis codes: 309.81<br>ICD 10 diagnosis codes: F43.10; F43.12                                                                                                                                                                                                                                                                                                                    |
| <b>Cardiac valve disease</b>            |                                   | ICD 9- CM diagnosis codes: 394.X, 395.X, 396.X, 424.0, 424.1                                                                                                                                                                                                                                                                                                                                   |
| <b>Arrhythmia</b>                       | Atrial fibrillation/flutter       | ICD 10 diagnosis codes: I05.*; I06.*; I08.*; I34.*; I35.*;<br>ICD 9- CM diagnosis codes: 427.3X<br>ICD 10 diagnosis codes: I48.91, I48.92                                                                                                                                                                                                                                                      |
| <b>Smoking</b>                          |                                   | ICD 9- CM diagnosis codes: 305.1, V15.82, 989.84<br>ICD 10 diagnosis codes: F17.200, Z87.891, T65.211A, T65.212A, T65.213A, T65.214A, T65.221A, T65.222A, T65.223A, T65.224A, T65.292A, T65.293A, T65.294A<br>Medications: Varenicline tartrate, Nicotine Replacement (gum, patch, lozenge)                                                                                                    |
| <b>COPD/ Asthma</b>                     |                                   | ICD 9- CM diagnosis codes: 491.X, 492.X, 493.X, 496.X, V17.5, V81.3<br>ICD 10 diagnosis codes: J41.0, J41.1, J44.9, J44.1, J44.0, J41.8, J42-J43.9, J45.20, J45.22, J45.21, J45.990, J45.991, J45.909, J45.998, J45.902, J45.901, Z13.83                                                                                                                                                       |
| <b>HIV</b>                              |                                   | ICD 9- CM diagnosis codes: 042, 079.53, 795.71, V08<br>ICD 10 diagnosis codes: B20.*; B97.35; Z21                                                                                                                                                                                                                                                                                              |
| <b>Parkinson's Disease</b>              |                                   | ICD 9- CM diagnosis codes: 332<br>ICD 10 diagnosis codes: G20; G21.*<br>Medications: Apokyn, Apomorphine, Carbidopa/levodopa, Entacapone, Pergolide, Pramipexole, Ropinirole, Rotigotine, Selegiline, Tolcapone, Zelapar, Azilect/Rasagiline, Emsam, Isocarboxazid, Phenelzine, Tranylcypromine, Biperiden/Akineton, Comtan/Entacapone, Safinamide, Trihexyphenidyl                            |
| <b>Urinary Tract / Kidney Infection</b> |                                   | ICD 9- CM diagnosis codes: 590.*, 599.0*, 595.0<br>ICD 10 diagnosis codes: N11.*; N39.* N30.*                                                                                                                                                                                                                                                                                                  |
| <b>Osteomyelitis</b>                    |                                   | ICD 9- CM diagnosis codes: 730.*<br>ICD 10 diagnosis codes: M86.1*; M86.2*; M86.6*; M86.9*; A02.24                                                                                                                                                                                                                                                                                             |
| <b>Sepsis/Bacteremia</b>                |                                   | ICD 9- CM diagnosis codes: 995.91, 995.92, 038.*, 036.2, 790.7<br>ICD 10 diagnosis codes: A41.9; R65.20; A41.*; A39.4; R78.81                                                                                                                                                                                                                                                                  |

|                                                                                  |                                                |                                                                                                                                                                                                                                                                                                                                                                                                                                                                                                                                                                                                                                                                                                                                                                                                                                                                                                 |
|----------------------------------------------------------------------------------|------------------------------------------------|-------------------------------------------------------------------------------------------------------------------------------------------------------------------------------------------------------------------------------------------------------------------------------------------------------------------------------------------------------------------------------------------------------------------------------------------------------------------------------------------------------------------------------------------------------------------------------------------------------------------------------------------------------------------------------------------------------------------------------------------------------------------------------------------------------------------------------------------------------------------------------------------------|
| <b>Pneumonia</b>                                                                 |                                                | ICD 9- CM diagnosis codes: 480.*-486.*, 487.0<br>ICD 10 diagnosis codes: J11.*; J12.*; J13.*; J14.*; J15.*; J16.*; J17.*; J18.*                                                                                                                                                                                                                                                                                                                                                                                                                                                                                                                                                                                                                                                                                                                                                                 |
| <b>Fractures (any)</b>                                                           |                                                | ICD 9- CM diagnosis codes: 733.1*, 800.*-829.*, E887<br>ICD 10 diagnosis codes: M84.*; M80.*; S02.*; S12.*; S22.*; S32.*; S42.*; S52.*; S62.*; S72.*; S82.*; S92.*                                                                                                                                                                                                                                                                                                                                                                                                                                                                                                                                                                                                                                                                                                                              |
| <b>Falls</b>                                                                     |                                                | ICD 9- CM diagnosis codes: E880.*; E881.*; E884.*; E885.9<br>ICD 10 diagnosis codes: Z98.8, W18.30XA, W18.49XA, W01.110A, W01.198A, W19.XXXA                                                                                                                                                                                                                                                                                                                                                                                                                                                                                                                                                                                                                                                                                                                                                    |
| <b>Osteoporosis</b>                                                              |                                                | ICD 9- CM diagnosis codes: 733.0*<br>ICD 10 diagnosis codes: M81.*                                                                                                                                                                                                                                                                                                                                                                                                                                                                                                                                                                                                                                                                                                                                                                                                                              |
| <b>Retinopathy</b>                                                               |                                                | ICD 9- CM diagnosis codes: 362.01, 362.02, 362.03, 362.04, 362.05, 362.06, 362.07<br>ICD 10 diagnosis codes: E08.311; E08.319; E08.3211; E08.3212; E08.3291; E08.3292; E08.3293; E08.3299; E08.3219; E08.3213; E08.3313; E08.3312; E08.3311; E08.3319; E08.3391; E08.3392; E08.3393; E08.3399; E08.3411; E08.3412; E08.3413; E08.3419; E08.3491; E08.3492; E08.3493; E08.3499; E08.3511; E08.3512; E08.3513; E08.3519; E08.3521; E08.3522; E08.3523; E08.3529; E08.3531; E08.3532; E08.3533; E08.3539; E08.3541; E08.3542; E08.3543; E08.3549; E08.3551; E08.3552; E08.3553; E08.3559; E08.3591; E08.3592; E08.3593; E08.3599; E11.311; E11.3491; E11.3492; E11.3493; E11.3499; E11.3591; E11.3592; E11.3593; E11.3599; E11.3591; E11.3592; E11.3593; E11.3599; E11.3291; E11.3292; E11.3293; E11.3299; E11.3391; E11.3392; E11.3393; E11.3399; E11.3491; E11.3492; E11.3493; E11.3499; E11.319 |
| <b>Amputations</b>                                                               |                                                | ICD 9- CM diagnosis codes: V49.75; V49.76; V49.77<br>ICD 10 diagnosis codes: Z89.519; Z47.81; Z89.6*                                                                                                                                                                                                                                                                                                                                                                                                                                                                                                                                                                                                                                                                                                                                                                                            |
| <b>Medications<br/>Antipsychotics</b>                                            | Atypical and typical antipsychotic medications | Lithium, Clozapine, Haloperidol, Loxapine, Lurasidone, Molindone, Olanzapine, Paliperidone, Quetiapine Fumerate; Risperidone, Aripiprazole, Asenapine, Ziprasidone, Chlorpromazine, Fluphenazine, Fluphenazine Deconate, Mesoridazine, Perphenazine, Thioridazine, Thiothixene; Trifluoperazine; Triflupromazine, Asenapine, Chlorprothixene, Iloperidone, Molindone, Promazine, Piperacetazine, Methotrimeprazine, Acetophenazine, Fazaclo/clozapine, Molindone                                                                                                                                                                                                                                                                                                                                                                                                                                |
| <b>ACE Inhibitors<br/>alone/combo<br/>ARBs<br/>alone/combo<br/>Beta-blockers</b> |                                                | Benazepril, Captopril, Enalapril, Fosinopril, Lisinopril, Moexipril, Perindopril, Quinapril, Ramipril, Trandolapril<br>Candesartan, Eprosartan, Irbesartan, Losartan, Azilsartan, Olmesartan, Telmisartan, Valsartan<br>Acebutolol, Atenolol, Betaxolol, Bisoprolol, Carteolol, Carvedilol, Esmolol, Labetalol, Metoprolol Tartrate, Metoprolol Succinate, Propranolol, Penbutolol, Pindolol, Nadolol, Sotalol, Timolol, Nebivolol                                                                                                                                                                                                                                                                                                                                                                                                                                                              |
| <b>Calcium Channel<br/>Blockers</b>                                              |                                                | Amlodipine, Isradipine; Felodipine, Nifedipine, Nifedipine ER, Nicardipine; Diltiazem, Verapamil, Nimodipine; Nisoldipine; Bepridil, Amlodipine/Atorvastatin, Clevidipine Butyrate; Mibefradil                                                                                                                                                                                                                                                                                                                                                                                                                                                                                                                                                                                                                                                                                                  |
| <b>Thiazide diuretics/<br/>Potassium sparing<br/>diuretics</b>                   |                                                | Chlorothiazide, Chlorthalidone, Hydrochlorothiazide, Methyclothiazide, Trichlormethiazide, Metolazone, Indapamide, Eplerenone; Amiloride, Spironolactone,                                                                                                                                                                                                                                                                                                                                                                                                                                                                                                                                                                                                                                                                                                                                       |

|                                                         |                      |                                                                                                                                                                                                                                                                                                                                                                                                                                                                         |
|---------------------------------------------------------|----------------------|-------------------------------------------------------------------------------------------------------------------------------------------------------------------------------------------------------------------------------------------------------------------------------------------------------------------------------------------------------------------------------------------------------------------------------------------------------------------------|
| <b>Other Antihypertensives</b>                          |                      | Triamterene, Hydrochlorothiazide/Triamterene, Hydrochlorothiazide/Spironolactone, Bendroflumethiazide, Benzthiazide, Cyclothiazide, Hydroflumethiazide, Polythiazide, Quinethazone<br>Doxazosin, Prazosin, Terazosin, Clonidine, Guanabenz, Guanfacine, Hydralazine, Methyldopa, Metyrosine, Reserpine, Minoxidil, Alfuzosin, Silodosin, Alseroxylon, Cryptenamine, Deserpidine, Diazoxide, Guanethidine, Mecamylamine, Pargyline, Rescinnamine, Trimethaphan Camsylate |
| <b>Anti-arrhythmics<br/>Digoxin and other inotropes</b> | 1. Digoxin           | Digoxin, Digitalis                                                                                                                                                                                                                                                                                                                                                                                                                                                      |
|                                                         | 2. Anti- Arrhythmics | Adenosine, Amiodarone, Lidocaine, Flecainide, Ibutilide, Procainamide, Propafenone, Ropafenone, Quinidine, Disopyramide, Verapamil, Dofetilide, Mexiletine, Moricizine, Tocainide                                                                                                                                                                                                                                                                                       |
| <b>Anticoagulants</b>                                   |                      | Warfarin, Argatroban, Bivalirudin, Dalteparin, Enoxaprin, Eptifibatide, Fondaparinux, Heparin, Lepirudin, Tirofiban, Tinzaparin, Reviparin, Nadroparin, Ardeparin, Certoparin, Dabigatran                                                                                                                                                                                                                                                                               |
| <b>Platelet inhibitors, not aspirin</b>                 |                      | Clopidogrel, Ticlopidine, Aspirin/Dipyridamole, Dipyridamole alone, Abciximab, Factor IX, Factor VIIa, Factor VIII, Prasugrel, Ticagrelor                                                                                                                                                                                                                                                                                                                               |
| <b>Statins</b>                                          |                      | Atorvastatin, Fluvastatin, Lovastatin, Pravastatin, Simvastatin, Rosuvastatin, Cerivastatin Pitavastatin, Lovastatin ER, Ezetimibe/Simvastatin, Lovastatin/Niacin, Amlodipine/Atorvastatin                                                                                                                                                                                                                                                                              |
| <b>Non-Statin lipid lowering drugs</b>                  |                      | Cholestyramine, Colesevelam, Clofibrate, Colestipol, Niacin, Niacinamide, Fish Oil Concentrate, Omega 3 Fatty Acids, Gemfibrozil, Fenofibrate, Fenofibric Acid, Ezetimibe Omacor, Tricor/Fenofibrate, Ezetimibe/Simvastatin                                                                                                                                                                                                                                             |
| <b>Nitrates</b>                                         |                      | Amyl Nitrate, Isosorbide Dinitrate, Isosorbide Mononitrate, Erythryl Tetranitrate, Nitroglycerin (all forms--SA, Patch, SL, Ointment; Aerosol spray), Ranolazine                                                                                                                                                                                                                                                                                                        |
| <b>Aspirin<br/>Loop Diuretics</b>                       |                      | Aspirin, Aspirin/ Dipyridamole<br>Furosemide, Ethacrynic acid, Bumetanide, Torsemide                                                                                                                                                                                                                                                                                                                                                                                    |

ACEI = angiotensin-converting enzyme inhibitor; ARB = angiotensin-receptor blocker; COPD = chronic obstructive pulmonary disease; CPT = Current Procedural Terminology; ICD-9- CM = International Classification of Diseases, Ninth Revision; ICD 10= International Classification of Diseases, Tenth Revision; MI = myocardial infarction; TIA = transient ischemic attack.

If medications are combinations of 2 drug classes then a patient is recorded as using both medications.

\* Each co-morbid condition was defined as present if there was 1 specified inpatient or 2 specified outpatient codes separated by 30 days, or 1 specified procedure code or prescription for a medication defining that comorbid condition before reaching the kidney



**Supplemental Table 3: Full cohort of patient characteristics on index date of kidney function decline and on day 361 after kidney function decline**

| Characteristics                                                  | Full Unweighted Cohort at Index Date |                             |       | Full Unweighted Cohort at 361 Days |                             |       |
|------------------------------------------------------------------|--------------------------------------|-----------------------------|-------|------------------------------------|-----------------------------|-------|
|                                                                  | Metformin<br>(n = 74096)             | Sulfonylurea<br>(n = 28967) | SMD†  | Metformin<br>(n = 36038)           | Sulfonylurea<br>(n = 15541) | SMD†  |
| Age, years*                                                      | 67.69 [62.7, 74.4]                   | 71.57 [64.2, 79.0]          | 0.302 | 69.10 [64.4, 76.0]                 | 73.36 [65.9, 80.3]          | 0.312 |
| Male, N (%)                                                      | 70849 (95.6)                         | 28419 (98.1)                | 0.143 | 34484 (95.7)                       | 15296 (98.4)                | 0.162 |
| Race, N (%)                                                      |                                      |                             | 0.046 |                                    |                             | 0.105 |
| White                                                            | 62649 (84.6)                         | 24210 (83.6)                |       | 31855 (88.4)                       | 13304 (85.6)                |       |
| Black or African American                                        | 9777 (13.2)                          | 4215 (14.6)                 |       | 3415 (9.5)                         | 1971 (12.7)                 |       |
| Other‡                                                           | 1670 (2.3)                           | 542 (1.9)                   |       | 768 (2.1)                          | 266 (1.7)                   |       |
| Cohort entry to index date, months*                              | 17.00 [6.77, 36.67]                  | 13.77 [5.97, 29.63]         | 0.172 | 31.33 [20.1, 51.2]                 | 27.67 [18.7, 43.5]          | 0.186 |
| Year of reaching kidney threshold, N (%)                         |                                      |                             | 0.796 |                                    |                             | 0.84  |
| 2002-03                                                          | 3051 (4.1)                           | 4703 (16.2)                 |       | 1710 (4.7)                         | 2870 (18.5)                 |       |
| 2004-05                                                          | 5572 (7.5)                           | 5507 (19.0)                 |       | 2904 (8.1)                         | 3143 (20.2)                 |       |
| 2006-07                                                          | 8755 (11.8)                          | 5833 (20.1)                 |       | 4823 (13.4)                        | 3309 (21.3)                 |       |
| 2008-09                                                          | 9619 (13.0)                          | 3926 (13.6)                 |       | 5157 (14.3)                        | 2127 (13.7)                 |       |
| 2010-11                                                          | 12019 (16.2)                         | 3255 (11.2)                 |       | 6449 (17.9)                        | 1726 (11.1)                 |       |
| 2012-13                                                          | 12653 (17.1)                         | 2575 (8.9)                  |       | 6827 (18.9)                        | 1280 (8.2)                  |       |
| 2014-15                                                          | 14484 (19.5)                         | 2186 (7.5)                  |       | 8125 (22.5)                        | 1082 (7.0)                  |       |
| 2016                                                             | 7943 (10.7)                          | 982 (3.4)                   |       | 43 (0.1)                           | 4 (0)                       |       |
| <b>Laboratory Variables</b>                                      |                                      |                             |       |                                    |                             |       |
| HbA1c (median [IQR])                                             | 6.5 [6.1, 7.0]                       | 6.6 [6.1, 7.3]              | 0.144 | 6.4 [6.0, 6.9]                     | 6.5 [6.1, 7.2]              | 0.21  |
| HbA1c Missing = TRUE (%)                                         | 2980 (4.0)                           | 1129 (3.9)                  | 0.006 | 1423 (3.9)                         | 583 (3.8)                   | 0.01  |
| Estimated Glomerular filtration rate prior to index date ml/min* | 70.3 [65.0, 78.3]                    | 69.0 [64.2, 76.0]           | 0.142 | --                                 | --                          |       |
| Estimated Glomerular filtration rate on index date ml/min*       | 55.8 [51.5, 58.0]                    | 55.5 [51.4, 58.0]           | 0.006 | 56.2 [52.7, 58.3]                  | 55.7 [51.7, 58.1]           | 0.104 |
| Estimated Glomerular filtration on day 361, ml/min*              | --                                   | --                          |       | 65.0 [57.1, 74.0]                  | 63.1 [55.0, 71.8]           | 0.177 |
| Estimated Glomerular filtration missing                          | 609 (0.8)                            | 380 (1.3)                   | 0.048 | 2194 (6.1)                         | 1268 (8.2)                  | 0.081 |
| Hemoglobin, g/dL*                                                | 14.0 [12.9, 15.0]                    | 14.1 [13.0, 15.2]           | 0.05  | 13.9 [12.9, 14.8]                  | 14.0 [12.9, 15.1]           | 0.068 |
| Missing Hemoglobin measure (%)                                   | 3823 (5.2)                           | 1700 (5.9)                  | 0.031 | 1890 (5.2)                         | 989 (6.4)                   | 0.048 |
| Low Density Lipoprotein, mg/dL*                                  | 84 [67, 105]                         | 89 [71, 111]                | 0.133 | 80 [65, 99]                        | 86 [69, 105]                | 0.16  |
| Missing Low Density Lipoprotein measure (%)                      | 1381 (1.9)                           | 1092 (3.8)                  | 0.115 | 591 (1.6)                          | 456 (2.9)                   | 0.087 |
| Microalbumin to creatinine ratio stage N(%)                      |                                      |                             | 0.159 |                                    |                             | 0.152 |
| A1 (<30 mg/g- normal)                                            | 32759 (44.2)                         | 10719 (37.0)                |       | 16934 (47.0)                       | 6259 (40.3)                 |       |
| A2 (30-300 mg/g-                                                 | 8365 (11.3)                          | 3149 (10.9)                 |       | 4433 (12.3)                        | 1808 (11.6)                 |       |

Appendix 1, as supplied by the authors. Appendix to: Hung AM, Hackstadt AJ, Griffin MR, et al. Comparative effectiveness of metformin versus sulfonylureas on kidney function decline or death among patients with reduced kidney function: a retrospective cohort study. *CMAJ Open* 2023. DOI:10.9778/cmajo.20210207. Copyright © 2023 The Author(s) or their employer(s). To receive this resource in an accessible format, please contact us at [cmajgroup@cmaj.ca](mailto:cmajgroup@cmaj.ca).

|                                       |                  |                  |       |                   |                   |       |
|---------------------------------------|------------------|------------------|-------|-------------------|-------------------|-------|
| microalbuminuria)                     |                  |                  |       |                   |                   |       |
| A3 (>300 mg/g                         | 2000 ( 2.7)      | 938 ( 3.2)       |       | 938 ( 2.6)        | 505 ( 3.2)        |       |
| macroalbuminuria)                     |                  |                  |       |                   |                   |       |
| Unknown                               | 30972 (41.8)     | 14161 (48.9)     |       | 13733 (38.1)      | 6969 (44.8)       |       |
| Proteinuria by urinalysis N (%)       |                  |                  | 0.072 |                   |                   | 0.084 |
| Negative                              | 36063 (48.7)     | 13513 (46.6)     |       | 18401 (51.1)      | 7439 (47.9)       |       |
| Urine Protein Trace or 1+             | 10635 (14.4)     | 4107 (14.2)      |       | 4667 (13.0)       | 2092 (13.5)       |       |
| Proteinuria present at 2+             | 2530 ( 3.4)      | 1001 ( 3.5)      |       | 967 ( 2.7)        | 431 ( 2.8)        |       |
| Proteinuria present at 3+ or 4+       | 667 ( 0.9)       | 455 ( 1.6)       |       | 248 ( 0.7)        | 200 ( 1.3)        |       |
| <b>Clinical Variables</b>             |                  |                  |       |                   |                   |       |
| Systolic Blood pressure, mm/Hg*       | 130 [118, 140]   | 131 [120, 143]   | 0.112 | 131 [120, 140]    | 132 [121, 143]    | 0.081 |
| Diastolic Blood pressure,mm/Hg*       | 73 [65, 80]      | 71 [64, 80]      | 0.123 | 73 [66, 80]       | 71 [64, 79]       | 0.172 |
| Missing Diastolic Blood pressure      | 86 ( 0.1)        | 50 ( 0.2)        | 0.015 | 30 ( 0.1)         | 12 ( 0.1)         | 0.002 |
| Body Mass Index, kg/meter *           | 31.0 [27.6,35.2] | 30.1 [26.9,34.1] | 0.159 | 30.7 [27.5, 34.8] | 30.1 [26.9, 33.9] | 0.121 |
| Missing BMI measure (%)               | 12796 (17.3)     | 5791 (20.0)      | 0.07  | 6006 (16.7)       | 3050 (19.6)       | 0.077 |
| <b>Baseline Co-morbidities N (%)</b>  |                  |                  |       |                   |                   |       |
| Malignancy                            | 8063 (10.9)      | 3580 (12.4)      | 0.046 | 4146 (11.5)       | 2095 (13.5)       | 0.06  |
| Liver disease                         | 1321 ( 1.8)      | 825 ( 2.8)       | 0.071 | 573 ( 1.6)        | 320 ( 2.1)        | 0.035 |
| HIV                                   | 242 ( 0.3)       | 103 ( 0.4)       | 0.005 | 84 ( 0.2)         | 51 ( 0.3)         | 0.018 |
| Congestive heart failure              | 6152 ( 8.3)      | 4212 (14.5)      | 0.197 | 2990 ( 8.3)       | 2455 (15.8)       | 0.232 |
| Cardiovascular disease                | 19296 (26.0)     | 9880 (34.1)      | 0.177 | 9364 (26.0)       | 5338 (34.3)       | 0.183 |
| Stroke                                | 1961 (2.6)       | 1024 ( 3.5)      | 0.051 | 897 ( 2.5)        | 558 ( 3.6)        | 0.064 |
| Transient Ischemic Attack             | 751 ( 1.0)       | 407 ( 1.4)       | 0.036 | 362 ( 1.0)        | 209 ( 1.3)        | 0.032 |
| Serious Mental Illness                | 17933 (24.2)     | 5669 (19.6)      | 0.112 | 8310 (23.1)       | 2906 (18.7)       | 0.107 |
| Smoking                               | 9464 (12.8)      | 3483 (12.0)      | 0.023 | 3776 (10.5)       | 1532 ( 9.9)       | 0.021 |
| Chronic Obstructive Pulmonary Disease | 11328 (15.3)     | 5311 (18.3)      | 0.082 | 5494 (15.2)       | 2894 (18.6)       | 0.09  |
| History of Respiratory failure        | 2277 ( 3.1)      | 980 ( 3.4)       | 0.018 | 1288 ( 3.6)       | 709 ( 4.6)        | 0.05  |
| History of Sepsis                     | 1118 ( 1.5)      | 509 ( 1.8)       | 0.02  | 754 ( 2.1)        | 385 ( 2.5)        | 0.026 |
| History of Pneumonia                  | 2411 ( 3.3)      | 1426 ( 4.9)      | 0.084 | 1363 ( 3.8)       | 937 ( 6.0)        | 0.104 |
| Arrhythmia                            | 10374 (14.0)     | 5529 (19.1)      | 0.137 | 5328 (14.8)       | 3301 (21.2)       | 0.169 |
| Cardiac valve disease                 | 2109 ( 2.8)      | 1205 ( 4.2)      | 0.071 | 1118 ( 3.1)       | 699 ( 4.5)        | 0.073 |
| Parkinson                             | 550 ( 0.7)       | 316 ( 1.1)       | 0.037 | 387 ( 1.1)        | 211 ( 1.4)        | 0.026 |
| Urinary tract infection               | 2512 ( 3.4)      | 1379 ( 4.8)      | 0.069 | 1513 ( 4.2)       | 894 ( 5.8)        | 0.072 |
| Osteomyelitis                         | 344 ( 0.5)       | 195 ( 0.7)       | 0.028 | 149 ( 0.4)        | 99 ( 0.6)         | 0.031 |
| Osteoporosis                          | 515 ( 0.7)       | 243 ( 0.8)       | 0.016 | 293 ( 0.8)        | 147 ( 0.9)        | 0.014 |
| Falls                                 | 168 ( 0.2)       | 75 ( 0.3)        | 0.007 | 123 ( 0.3)        | 74 ( 0.5)         | 0.021 |
| Fractures                             | 1371 ( 1.9)      | 683 ( 2.4)       | 0.035 | 781 ( 2.2)        | 419 ( 2.7)        | 0.034 |
| Amputation                            | 253 ( 0.3)       | 170 ( 0.6)       | 0.036 | 128 ( 0.4)        | 71 ( 0.5)         | 0.016 |
| Retinopathy                           | 522 ( 0.7)       | 385 ( 1.3)       | 0.062 | 209 ( 0.6)        | 189 ( 1.2)        | 0.067 |
| <b>Use of Medications N (%)</b>       |                  |                  |       |                   |                   |       |
| Angiotensin II Receptor Blockers      | 9920 (13.4)      | 3190 (11.0)      | 0.073 | 20947 (58.1)      | 9533 (61.3)       | 0.066 |

Appendix 1, as supplied by the authors. Appendix to: Hung AM, Hackstadt AJ, Griffin MR, et al. Comparative effectiveness of metformin versus sulfonylureas on kidney function decline or death among patients with reduced kidney function: a retrospective cohort study. *CMAJ Open* 2023. DOI:10.9778/cmajo.20210207. Copyright © 2023 The Author(s) or their employer(s). To receive this resource in an accessible format, please contact us at [cmajgroup@cmaj.ca](mailto:cmajgroup@cmaj.ca).

|                                                  |              |              |       |              |              |       |
|--------------------------------------------------|--------------|--------------|-------|--------------|--------------|-------|
| Beta Blockers                                    | 36525 (49.3) | 14880 (51.4) | 0.042 | 5352 (14.9)  | 1922 (12.4)  | 0.072 |
| Calcium Channel Blockers                         | 21498 (29.0) | 8654 (29.9)  | 0.019 | 18082 (50.2) | 8151 (52.4)  | 0.045 |
| Thiazide and potassium sparing diuretics         | 32308 (43.6) | 11459 (39.6) | 0.082 | 10641 (29.5) | 4726 (30.4)  | 0.019 |
| Loop Diuretics                                   | 11398 (15.4) | 6650 (23.0)  | 0.193 | 13572 (37.7) | 5523 (35.5)  | 0.044 |
| Other Antihypertensive medications               | 20684 (27.9) | 7949 (27.4)  | 0.011 | 5229 (14.5)  | 3475 (22.4)  | 0.203 |
| Statin Lipid Lowering Drugs                      | 54817 (74.0) | 18806 (64.9) | 0.198 | 11059 (30.7) | 4673 (30.1)  | 0.013 |
| Non- Statin Lipid Lowering agents                | 13873 (18.7) | 4642 (16.0)  | 0.071 | 27723 (76.9) | 10776 (69.3) | 0.172 |
| Anti-arrhythmics digoxin/ inotropes              | 4852 ( 6.5)  | 3161 (10.9)  | 0.155 | 6743 (18.7)  | 2658 (17.1)  | 0.042 |
| Anticoagulants, platelet inhibitors              | 6857 ( 9.3)  | 3167 (10.9)  | 0.056 | 2295 ( 6.4)  | 1578 (10.2)  | 0.138 |
| Nitrates                                         | 8478 (11.4)  | 4690 (16.2)  | 0.138 | 3627 (10.1)  | 1815 (11.7)  | 0.052 |
| Aspirin                                          | 15593 (21.0) | 6457 (22.3)  | 0.03  | 4037 (11.2)  | 2350 (15.1)  | 0.116 |
| Platelet Inhibitors Not aspirin                  | 6885 ( 9.3)  | 3154 (10.9)  | 0.053 | 7452 (20.7)  | 3222 (20.7)  | 0.001 |
| Antipsychotics                                   | 5721 ( 7.7)  | 1880 ( 6.5)  | 0.048 | 3318 ( 9.2)  | 1734 (11.2)  | 0.065 |
| Oral Glucocorticoids                             | 5751 ( 7.8)  | 2143 ( 7.4)  | 0.014 | 2506 ( 7.0)  | 912 ( 5.9)   | 0.044 |
| <b>Indicators of health care utilization</b>     |              |              |       |              |              |       |
| <b>N(%)</b>                                      |              |              |       |              |              |       |
| Hospitalized within year (Veterans Health)       | 9837 (13.3)  | 4414 (15.2)  | 0.056 | 3997 (11.1)  | 2050 (13.2)  | 0.064 |
| Hospitalized in 30 days (Veterans Health)        | 2732 ( 3.7)  | 1164 ( 4.0)  | 0.017 | 474 ( 1.3)   | 266 ( 1.7)   | 0.032 |
| Hospitalized within year (Medicare/<br>Medicaid) | 6165 ( 8.3)  | 3648 (12.6)  | 0.14  | 3102 ( 8.6)  | 2098 (13.5)  | 0.156 |
| Hospitalized in 30 days (Medicare/<br>Medicaid)  | 1074 ( 1.4)  | 585 ( 2.0)   | 0.044 | 355 ( 1.0)   | 273 ( 1.8)   | 0.066 |
| Medicaid use in last year                        | 622 ( 0.8)   | 399 ( 1.4)   | 0.051 | 235 ( 0.7)   | 256 ( 1.6)   | 0.093 |
| Medicare use in last year                        | 24088 (32.5) | 10820 (37.4) | 0.102 | 13150 (36.5) | 6555 (42.2)  | 0.117 |
| Nursing Home encounter in last year              | 230 ( 0.3)   | 135 ( 0.5)   | 0.025 | 149 ( 0.4)   | 94 ( 0.6)    | 0.027 |
| Medicare Advantage Use                           | 11879 (16.0) | 4546 (15.7)  | 0.009 | 7224 (20.0)  | 3010 (19.4)  | 0.017 |

\*Median and Interquartile Ranges reported

† SMD, standardized mean differences are the absolute difference in means or percentage divided by an evenly weighted pooled standard deviation, or the difference between groups in number of standard deviations.

‡Other races include American Indian or Alaska Native, Asian, and Native Hawaiian or Pacific Islander.

| <b>Supplemental Table 4: Events and N at risk in each Subgroup- *Hazard Ratio reported are from weighted and unadjusted analyses</b> |                                |                                |                               |                                |
|--------------------------------------------------------------------------------------------------------------------------------------|--------------------------------|--------------------------------|-------------------------------|--------------------------------|
|                                                                                                                                      | <b>Metformin N= 12,571</b>     | <b>Sulfonylurea N= 12,637</b>  |                               |                                |
| <b>Primary Outcome Kidney Event or Death</b>                                                                                         | <b>Events (N)/ At Risk (N)</b> | <b>Events (N)/ At Risk (N)</b> | <b>Hazard Ratio* (95% CI)</b> | <b>p value for interaction</b> |
| <b>Full matched weighted cohort</b>                                                                                                  | 747/12,571                     | 1033/12,637                    | 0.76 (0.70, 0.83)             |                                |
| <b>Renin Angiotensin Aldosterone System Inhibitor</b>                                                                                |                                |                                |                               |                                |
| No                                                                                                                                   | 295/3482                       | 389/3461                       | 0.65 (0.40, 1.04)             | p=0.72                         |
| Yes                                                                                                                                  | 453/9089                       | 644/9176                       | 0.72 (0.65, 0.80)             |                                |
| <b>eGFR</b>                                                                                                                          |                                |                                |                               |                                |
| <45 ml/min                                                                                                                           | 60/905                         | 74/880                         | 0.79 (0.59, 1.06)             | p=0.01                         |
| ≥ 45 ml/min                                                                                                                          | 687/11666                      | 958/11757                      | 0.72 (0.66, 0.79)             |                                |
| <b>Race</b>                                                                                                                          |                                |                                |                               |                                |
| Black                                                                                                                                | 60/1424                        | 89/1429                        | 0.71 (0.53, 0.95)             | p=0.84                         |
| Nonblack                                                                                                                             | 687/11147                      | 943/11208                      | 0.73 (0.67, 0.79)             |                                |
| <b>Age, y</b>                                                                                                                        |                                |                                |                               |                                |
| ≥ 65                                                                                                                                 | 638/9580                       | 873/9612                       | 0.76 (0.69, 0.83)             | p=0.80                         |
| <65                                                                                                                                  | 109/2989                       | 160/3025                       | 0.62 (0.50, 0.76)             |                                |
| <b>Secondary Outcome Kidney Event</b>                                                                                                |                                |                                |                               |                                |
| <b>Full matched weighted cohort</b>                                                                                                  | 110/12,571                     | 149/12,637                     | 0.89 (0.71, 1.12)             |                                |
| <b>Renin Angiotensin Aldosterone System Inhibitor</b>                                                                                |                                |                                |                               |                                |
| No                                                                                                                                   | 22/3482                        | 31/3461                        | 0.65 (0.40, 1.04)             | p=0.87                         |
| Yes                                                                                                                                  | 88/9089                        | 118/9176                       | 0.76 (0.60, 0.97)             |                                |
| <b>eGFR</b>                                                                                                                          |                                |                                |                               |                                |
| <45 ml/min                                                                                                                           | 4/905                          | 3/880                          | 1.24 (0.32, 4.78)             | p=0.15                         |
| ≥ 45 ml/min                                                                                                                          | 106/11666                      | 146/11757                      | 0.72 (0.58, 0.90)             |                                |
| <b>Race</b>                                                                                                                          |                                |                                |                               |                                |
| Black                                                                                                                                | 9/1424                         | 22/1429                        | 0.43 (0.22, 0.84)             | p=0.24                         |
| Nonblack                                                                                                                             | 101/11147                      | 127/11208                      | 0.78 (0.62, 0.99)             |                                |
| <b>Age, y</b>                                                                                                                        |                                |                                |                               |                                |
| ≥ 65                                                                                                                                 | 92/9580                        | 110/9612                       | 0.86 (0.68, 1.10)             | p=0.05                         |
| <65                                                                                                                                  | 18/2989                        | 39/3025                        | 0.38 (0.24, 0.61)             |                                |

Appendix 1, as supplied by the authors. Appendix to: Hung AM, Hackstadt AJ, Griffin MR, et al. Comparative effectiveness of metformin versus sulfonylureas on kidney function decline or death among patients with reduced kidney function: a retrospective cohort study. *CMAJ Open* 2023. DOI:10.9778/cmajo.20210207. Copyright © 2023 The Author(s) or their employer(s). To receive this resource in an accessible format, please contact us at [cmajgroup@cmaj.ca](mailto:cmajgroup@cmaj.ca).

**Supplemental Figure 1: Study Schema**

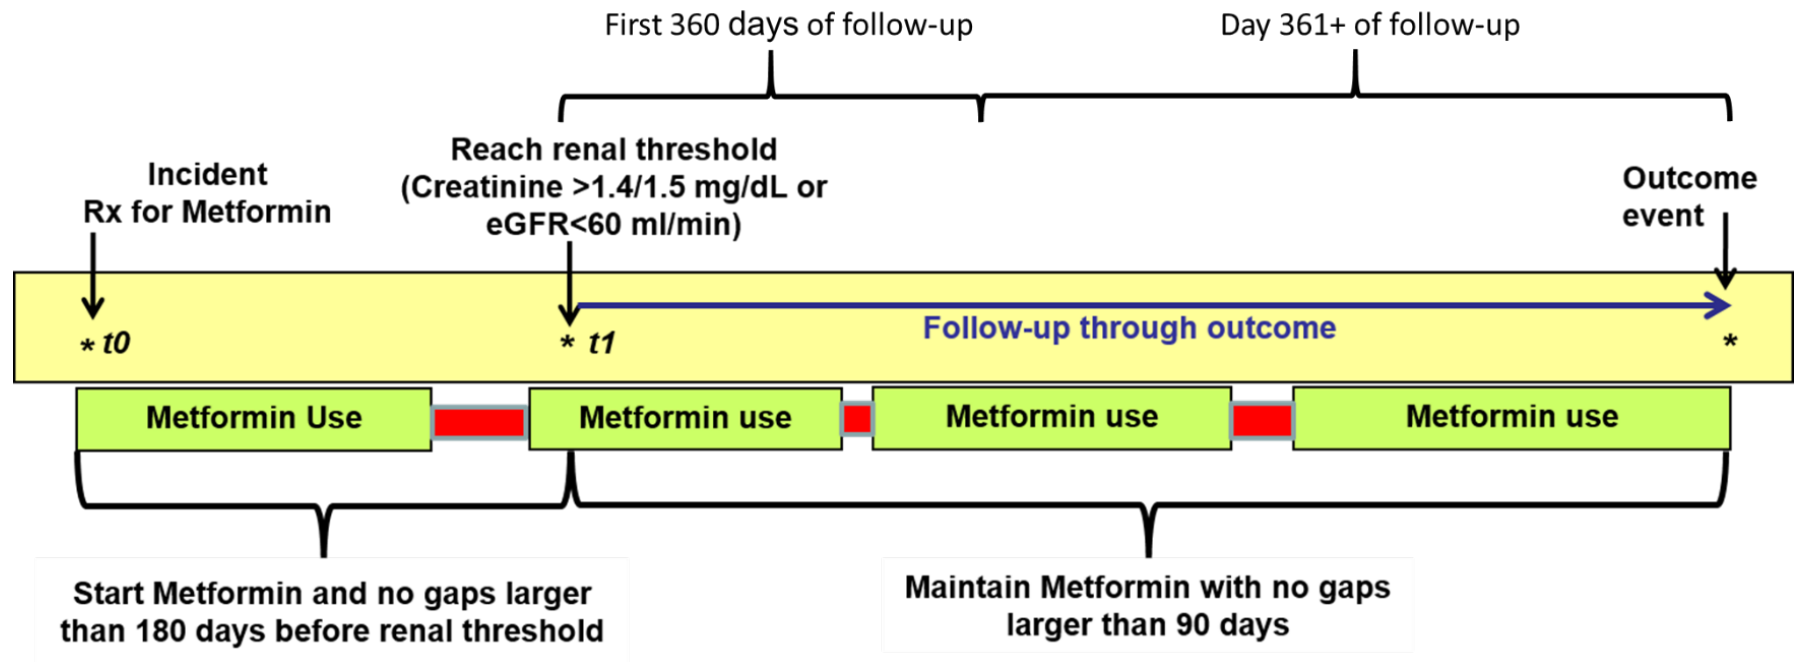

Supplement: open-2021-0207-1-at.pdf [file open-2021-0207-1-at.pdf]
